# Supplementary material for: Unique glycosignature for intervertebral disc and articular cartilage cells and tissues in immaturity and maturity
Source: PubMed Central journal article supplement (PMC4786852; doi:10.1038/srep23062), 2016-03-11
Supplement: srep23062-s1.pdf [file srep23062-s1.pdf]

## **Supplementary information**

### **Title: Unique glycosignature for intervertebral disc and articular cartilage cells and tissues in immaturity and maturity**

E.C. Collin<sup>1,†</sup>, M. Kilcoyne<sup>2,3,†</sup>, S.J. White<sup>3</sup>, S. Grad<sup>4</sup>, M. Alini<sup>4</sup>, L. Joshi<sup>1,3</sup>, A.S. Pandit<sup>1,\*</sup>

<sup>1</sup> Center for Research in Medical Devices (CÚRAM), National University of Ireland Galway, Ireland

<sup>2</sup> Microbiology, School of Natural Sciences, National University of Ireland Galway, Ireland

<sup>3</sup> Glycoscience Group, National University of Ireland Galway, Ireland

<sup>4</sup> AO Research Institute, Davos, Switzerland

\*Corresponding authors

† These authors have contributed equally.

| Lectin/antibody                                           | Abbreviation        | Binding specificity                                                                                                                         | Concentration (mg/mL) | Inhibitory glycan |
|-----------------------------------------------------------|---------------------|---------------------------------------------------------------------------------------------------------------------------------------------|-----------------------|-------------------|
| Lotus tetragonolobus agglutinin                           | LTA                 | Fuc- $\alpha$ -(1→3), Fuc- $\alpha$ -(1→6), Fuc- $\alpha$ -(1→2)                                                                            | 15                    | 100mM Fuc         |
| Ulex europaeus agglutinin I                               | UEA-I               | Fuc- $\alpha$ -(1→2)                                                                                                                        | 10                    | 100mM Fuc         |
| Aleuria aurantia agglutinin                               | AAA                 | Fuc- $\alpha$ -(1→6), Fuc- $\alpha$ -(1→3)                                                                                                  | 20                    | 100mM Fuc         |
| Anti-Lewis <sup>b</sup> antibody                          | Le <sup>b</sup>     | Fuc- $\alpha$ -(1→2)-Gal- $\beta$ -(1→3)-[Fuc- $\alpha$ -(1→4)]GlcNAc                                                                       | 1.25x10 <sup>-3</sup> | ---               |
| Sambucus nigra agglutinin I                               | SNA-I               | Neu- $\alpha$ -(2→6)-GalNAc > Lac, GalNAc > Gal                                                                                             | 20                    | 100mM Lac         |
| Maackia amurensis agglutinin                              | MAA                 | Neu- $\alpha$ -(2→3)-GalNAc, Gal-3S > Lac                                                                                                   | 20                    | 100mM Lac         |
| Griffonia simplicifolia isolectin                         | GS-I-B <sub>4</sub> | Terminal $\alpha$ -Gal                                                                                                                      | 10                    | 100mM Gal         |
| Concanavalin A                                            | Con A               | a-Man > $\epsilon$ -Glc > a-GlcNAc, complex biantennary structures                                                                          | 20                    | 100mM Man         |
| Peanut agglutinin                                         | PNA                 | Gal (Gal- $\beta$ -(1→3)-GalNAc (T-antigen) > GalNAc > Lac > Gal, terminal $\beta$ -Gal)                                                    | 10                    | 100mM Gal         |
| Artocarpus integrifolia agglutinin                        | Jacalin (AIA)       | Gal, Gal- $\beta$ -(1→3)-GalNAc (T-antigen), Gal- $\alpha$ -(1→6), sialylation independent                                                  | 10                    | 100mM Gal         |
| Soya bean agglutinin                                      | SBA                 | GalNAc > Gal                                                                                                                                | 10                    | 100mM GalNAc      |
| Wisteria floribunda agglutinin                            | WFA                 | GalNAc, GalNAc- $\alpha$ -(1→6)-Gal > GalNAc- $\alpha$ -(1→3)-GalNAc (Forsmann antigen) > GalNAc >> Lac > Gal, GlcA- $\alpha$ -(1→3)-GalNAc | 10                    | 100mM GalNAc      |
| Anti-chondroitin-4- and -6-sulfate antibody (CS-56 clone) | CS-56               | GlcA- $\alpha$ -(1→3)-GalNAc-4S, GlcA- $\alpha$ -(1→3)-GalNAc-6S                                                                            | 1/200 dilution        | ---               |
| Anti-chondroitin-6-sulfate antibody                       | C6S                 | GlcA- $\alpha$ -(1→3)-GalNAc-6S                                                                                                             | 1/200 dilution        | ---               |

**Table S1.** Lectins and antibodies used for tissue histochemistry, their specificities, concentrations and inhibitory carbohydrates.

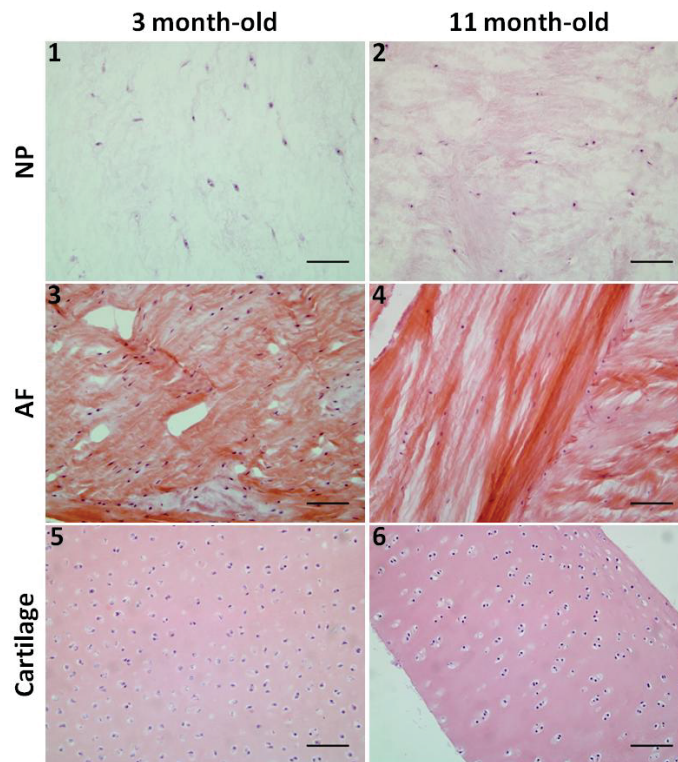

**Figure S1.** Representative images of hematoxylin and eosin stained ovine NP (1-2), AF (3-4) and cartilage tissue (5-6) at 3 and 11 months. ECM proteins and nuclei are stained in pink/red and purple/blue, respectively. Scale bar = 100 $\mu$ m.

**Table S2.** Quantity of C0S, C4S and C6S disaccharides ( $\mu\text{g}/\mu\text{g}$  of DNA) in 3 and 11 month ovine NP, AF and cartilage tissues. Data were normalized to DNA content and presented as mean  $\pm$  standard error of the mean (n=5). No significant difference was seen between the different groups ( $p<0.05$ ).

| <i>Age (months), tissue</i> | <i>C0S</i>      | <i>C4S</i>      | <i>C6S</i>      | <i>Total</i>    |
|-----------------------------|-----------------|-----------------|-----------------|-----------------|
| <b>3, NP</b>                | 0.14 $\pm$ 0.03 | 0.19 $\pm$ 0.03 | 0.16 $\pm$ 0.15 | 0.47 $\pm$ 0.11 |
| <b>11, NP</b>               | 0.25 $\pm$ 0.08 | 0.43 $\pm$ 0.14 | 0.04 $\pm$ 0.01 | 0.85 $\pm$ 0.23 |
| <b>3, AF</b>                | 0.13 $\pm$ 0.02 | 0.10 $\pm$ 0.01 | 0.24 $\pm$ 0.09 | 0.47 $\pm$ 0.09 |
| <b>11, AF</b>               | 0.10 $\pm$ 0.03 | 0.21 $\pm$ 0.07 | 0.03 $\pm$ 0.01 | 0.37 $\pm$ 0.10 |
| <b>3, cartilage</b>         | 0.10 $\pm$ 0.04 | 0.15 $\pm$ 0.06 | 0.05 $\pm$ 0.02 | 0.30 $\pm$ 0.12 |
| <b>11, cartilage</b>        | 0.10 $\pm$ 0.04 | 0.14 $\pm$ 0.05 | 0.04 $\pm$ 0.02 | 0.29 $\pm$ 0.10 |

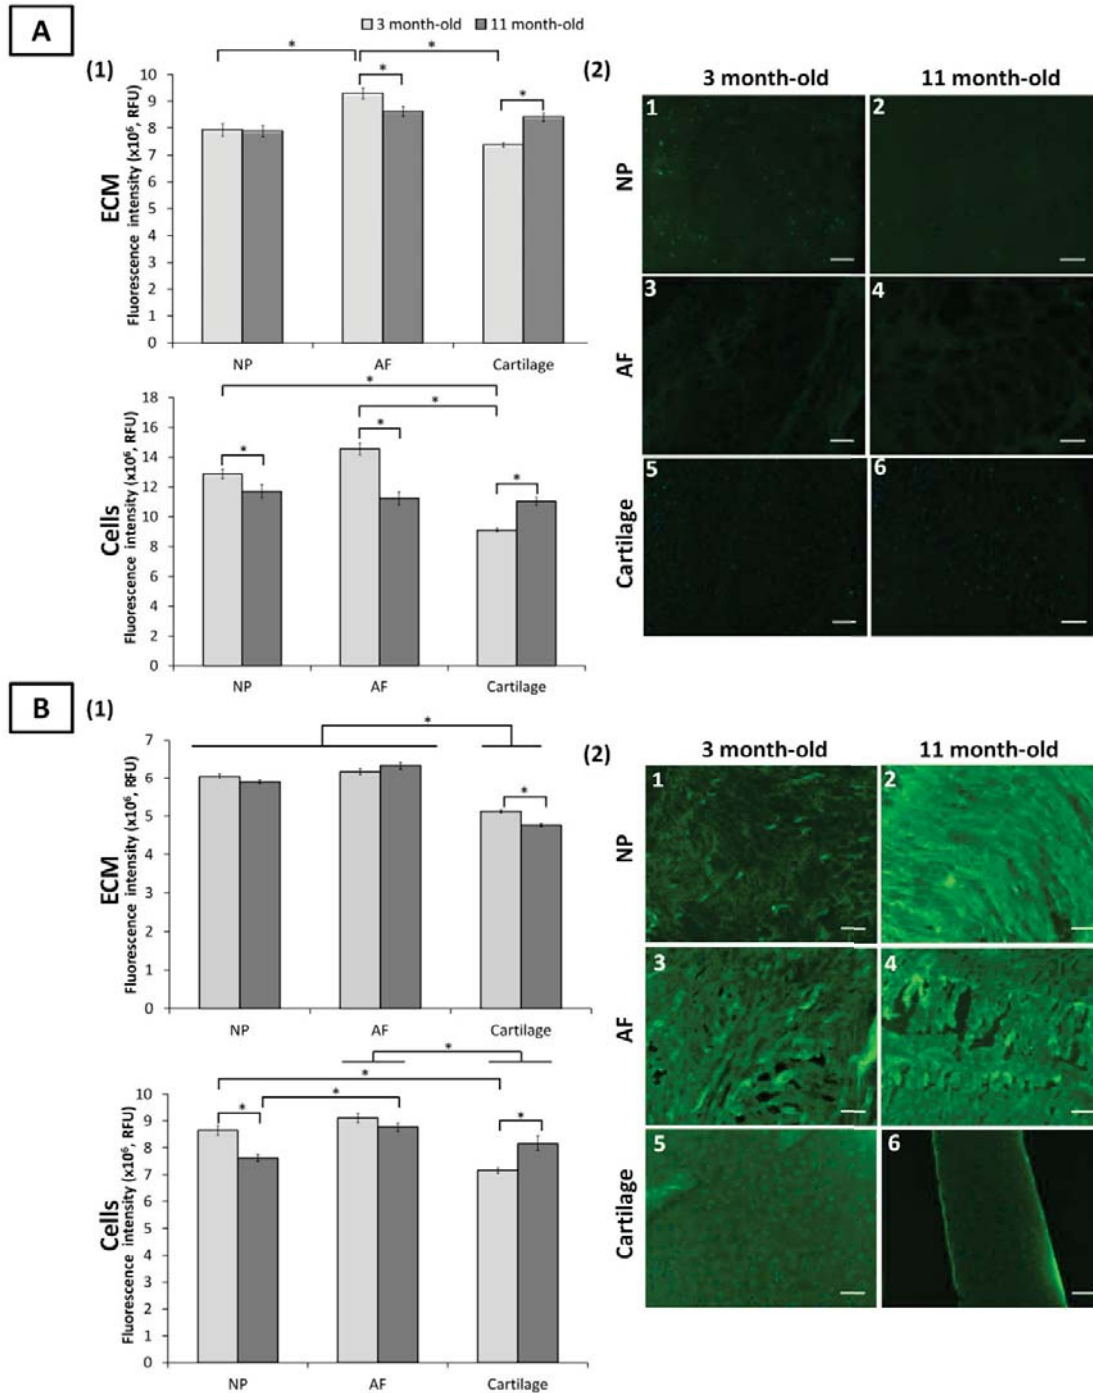

**Figure S2. Fucosylated motifs detected by UEA-I and AAA lectin staining in ovine NP, AF and cartilage tissues at three and 11 months. Quantification of UEA-I (A1) and AAA (B1) lectins binding to the ECM and onto the cells of NP, AF and cartilage tissues. Data were normalised to surface area and represented as mean  $\pm$  standard error of the mean ( $n = 5$ ). \* denotes significant differences between the different groups at  $p < 0.05$ . Representative fluorescent images of the stained motifs detected by UEA-I (A2) and AAA (B2) lectins binding in NP, AF, and cartilage tissues. Fucosylated motifs and nuclei are stained in green and blue, respectively. Scale bar = 100 $\mu$ m.**

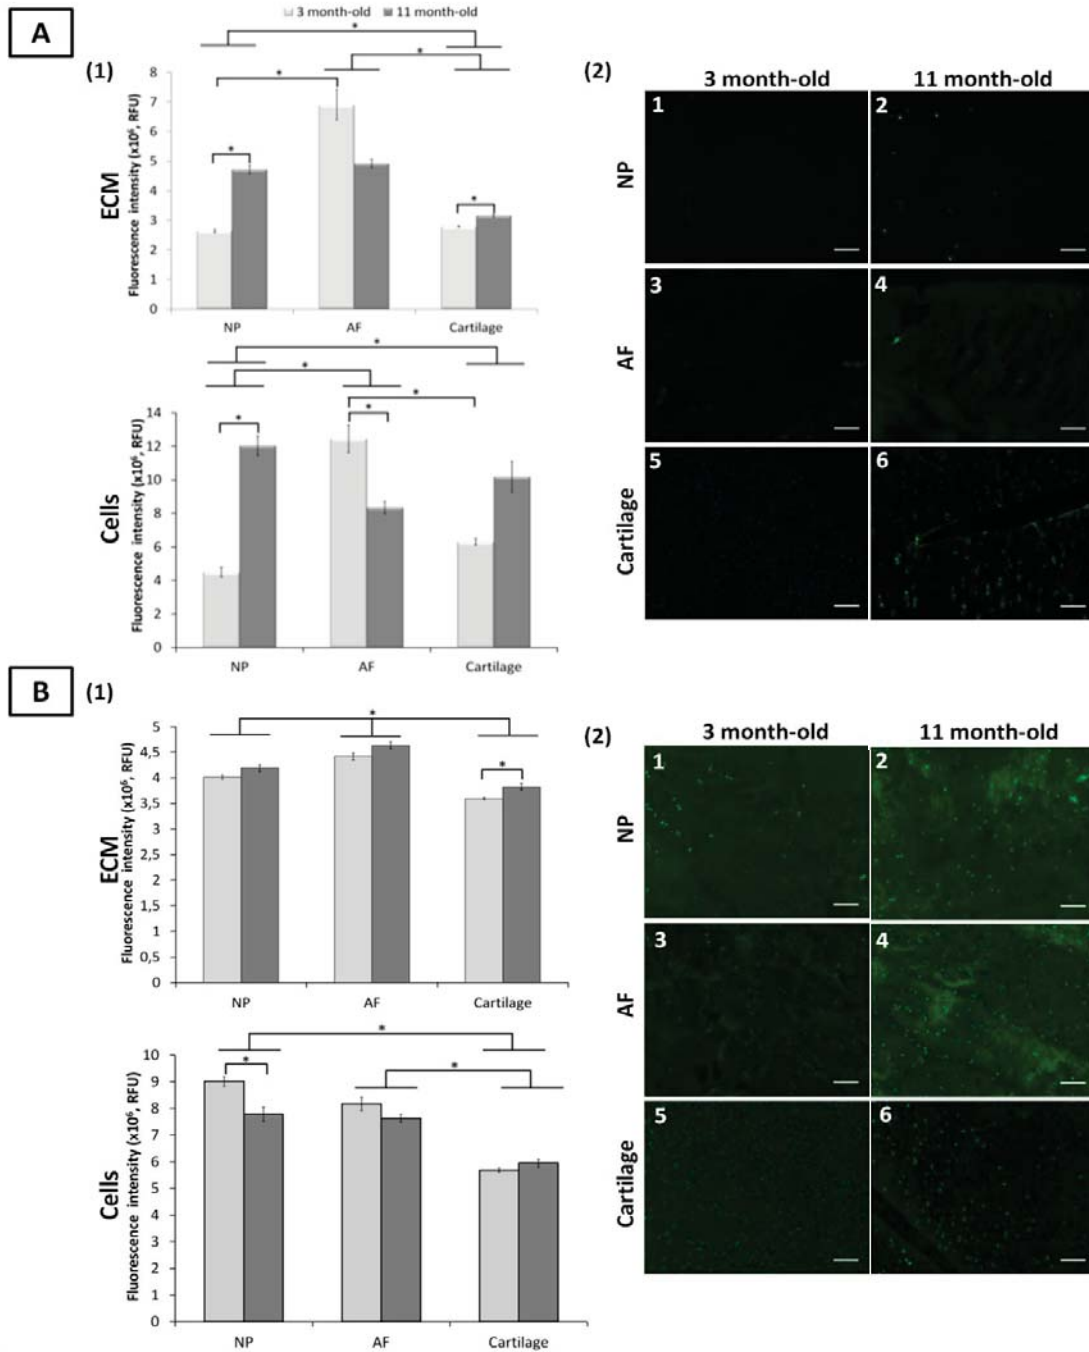

**Figure S3. Terminal  $\alpha$ -Gal motifs detected by GS-I-B<sub>4</sub> lectin staining and galcosylated motifs detected jacalin lectin staining of ovine NP, AF and cartilage tissues at three and 11 months. Quantification of GS-I-B<sub>4</sub> (A1) and jacalin (B1) lectins binding to the ECM and onto the cells of NP, AF and cartilage tissues. Data were normalised to surface area and represented as mean  $\pm$  standard error of the mean ( $n = 5$ ). \* denotes significant differences between the different groups at  $p < 0.05$ . Representative fluorescent images of the stained motifs detected by GS-I-B<sub>4</sub> (A2) and jacalin (B2) lectins binding in NP, AF, and cartilage tissues. Motifs and nuclei are stained in green and blue, respectively. Scale bar = 100 $\mu$ m.**

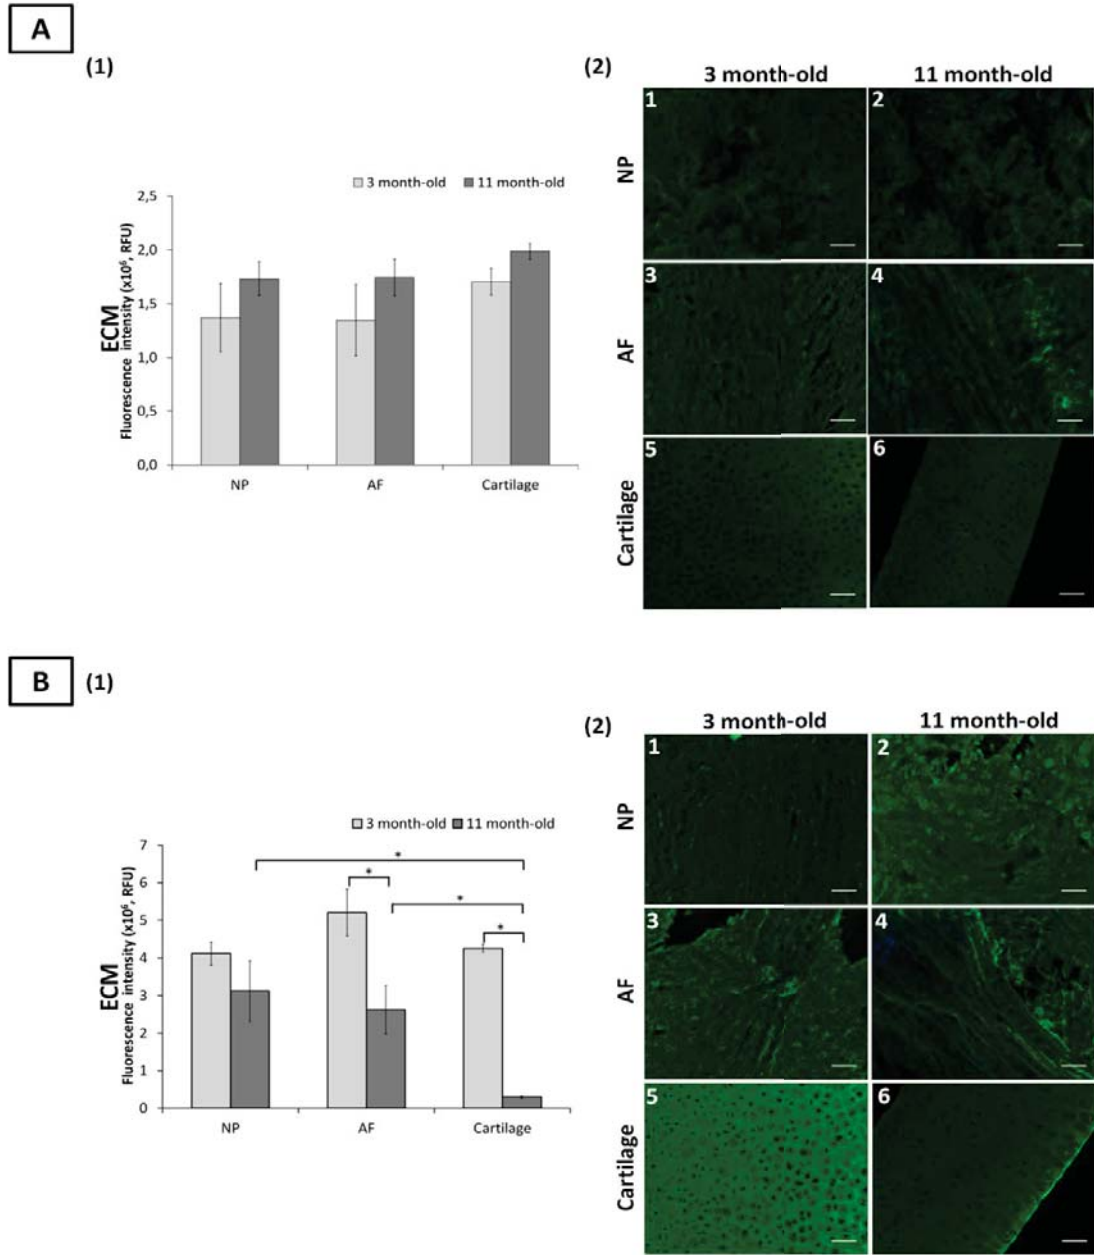

**Figure S4. Chondroitin sulfate detected by CS-56 (C4S + C6S) and C6S antibody staining in ovine NP, AF and cartilage tissues at three and 11 months. Quantification of CS-56 (C4S + C6S) (A1) and C6S antibody (B1) binding to the ECM and onto the cells of NP, AF and cartilage tissues. Data were normalised to surface area and represented as mean  $\pm$  standard error of the mean (n = 5). \* denotes significant differences between the different groups at  $p < 0.05$ . Representative fluorescent images of the stained motifs detected by CS-56 (C4S + C6S) (A2) and C6S antibody (B2) binding in NP, AF, and cartilage tissues. Motifs and nuclei are stained in green and blue, respectively. Scale bar = 100 $\mu$ m.**
